# Supplementary material for: Ecklonia cava Extract and Its Derivative Dieckol Promote Vasodilation by Modulating Calcium Signaling and PI3K/AKT/eNOS Pathway in In Vitro and In Vivo Models
Source: MDPI journal article supplement (doi:10.3390/biomedicines9040438), 2021-04-19
Supplement: s1 [file s1]

### Supplementary data- Material and method

Chromatography was performed on Agilent Technologies 1220 Infinity II LC with a column (poroshell 120 C18, 4.6\*100 mm, 4 $\mu$ m). The mobile phase consisted of A; DW (+0.1% Formic acid), B; MeOH (+0.1% Formic acid) as followed: (0 min A; 63% B; 37%, 0-10 min A; 45% B; 55%, 10-12 min A; 63% B; 37%, 12-20 min A; 63% B; 37%). The gradient elution was performed as follows: the flow rate was 0.4 mL/min, and the injection volume was 1 mL. Detection was performed at UV length 230 nm.

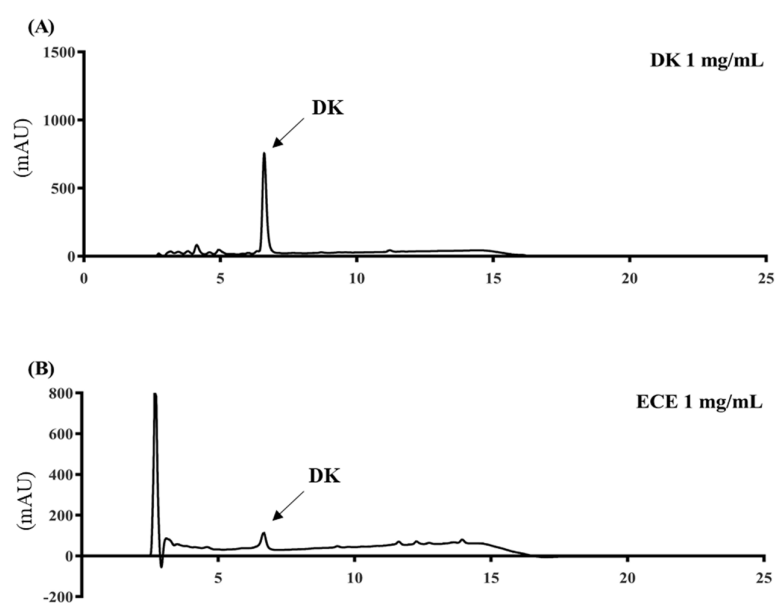

Figure S1. HPLC chromatography of (A) isolated DK (B) DK in ECE
